# Supplementary material for: Critical POU domain residues confer Oct4 uniqueness in somatic cell reprogramming
Source: PubMed Central journal article supplement (PMC4753506; doi:10.1038/srep20818), 2016-02-15
Supplement: srep20818-s1.pdf [file srep20818-s1.pdf]

## Supplementary information

### Critical POU domain residues confer Oct4 uniqueness in somatic cell reprogramming

Wensong Jin<sup>1,2,4</sup>, Lei Wang<sup>3,4</sup>, Fei Zhu<sup>1</sup>, Weiqi Tan<sup>2</sup>, Wei Lin<sup>1</sup>, Dahua Chen<sup>2,\*</sup>,  
Qinmiao Sun<sup>1,\*</sup> and Zongping Xia<sup>3,\*</sup>

<sup>1</sup>State Key Laboratory of Membrane Biology, Institute of Zoology, Chinese Academy of Sciences, Chaoyang, Beijing 100101, P. R. China.

<sup>2</sup>State Key Laboratory of Stem Cell and Reproductive Biology, Institute of Zoology, Chinese Academy of Sciences, Chaoyang, Beijing 100101, P. R. China.

<sup>3</sup>Life Sciences Institute and Innovation Center for Cell Signaling Network, Zhejiang University, Hangzhou, Zhejiang 310058, P. R. China.

<sup>4</sup>These authors contributed equally to this work.

#### \* Authors to whom proofs should be addressed:

Dahua Chen, PhD

Tel: 86-10-64807325

E-mail: chendh@ioz.ac.cn

Qinmiao Sun, PhD

Tel: 86-10-64807391

E-mail: qinmiao@ioz.ac.cn

Zongping Xia, PhD

Tel: 86-571-88981625

E-mail: xia2010@zju.edu.cn

# Supplementary figures

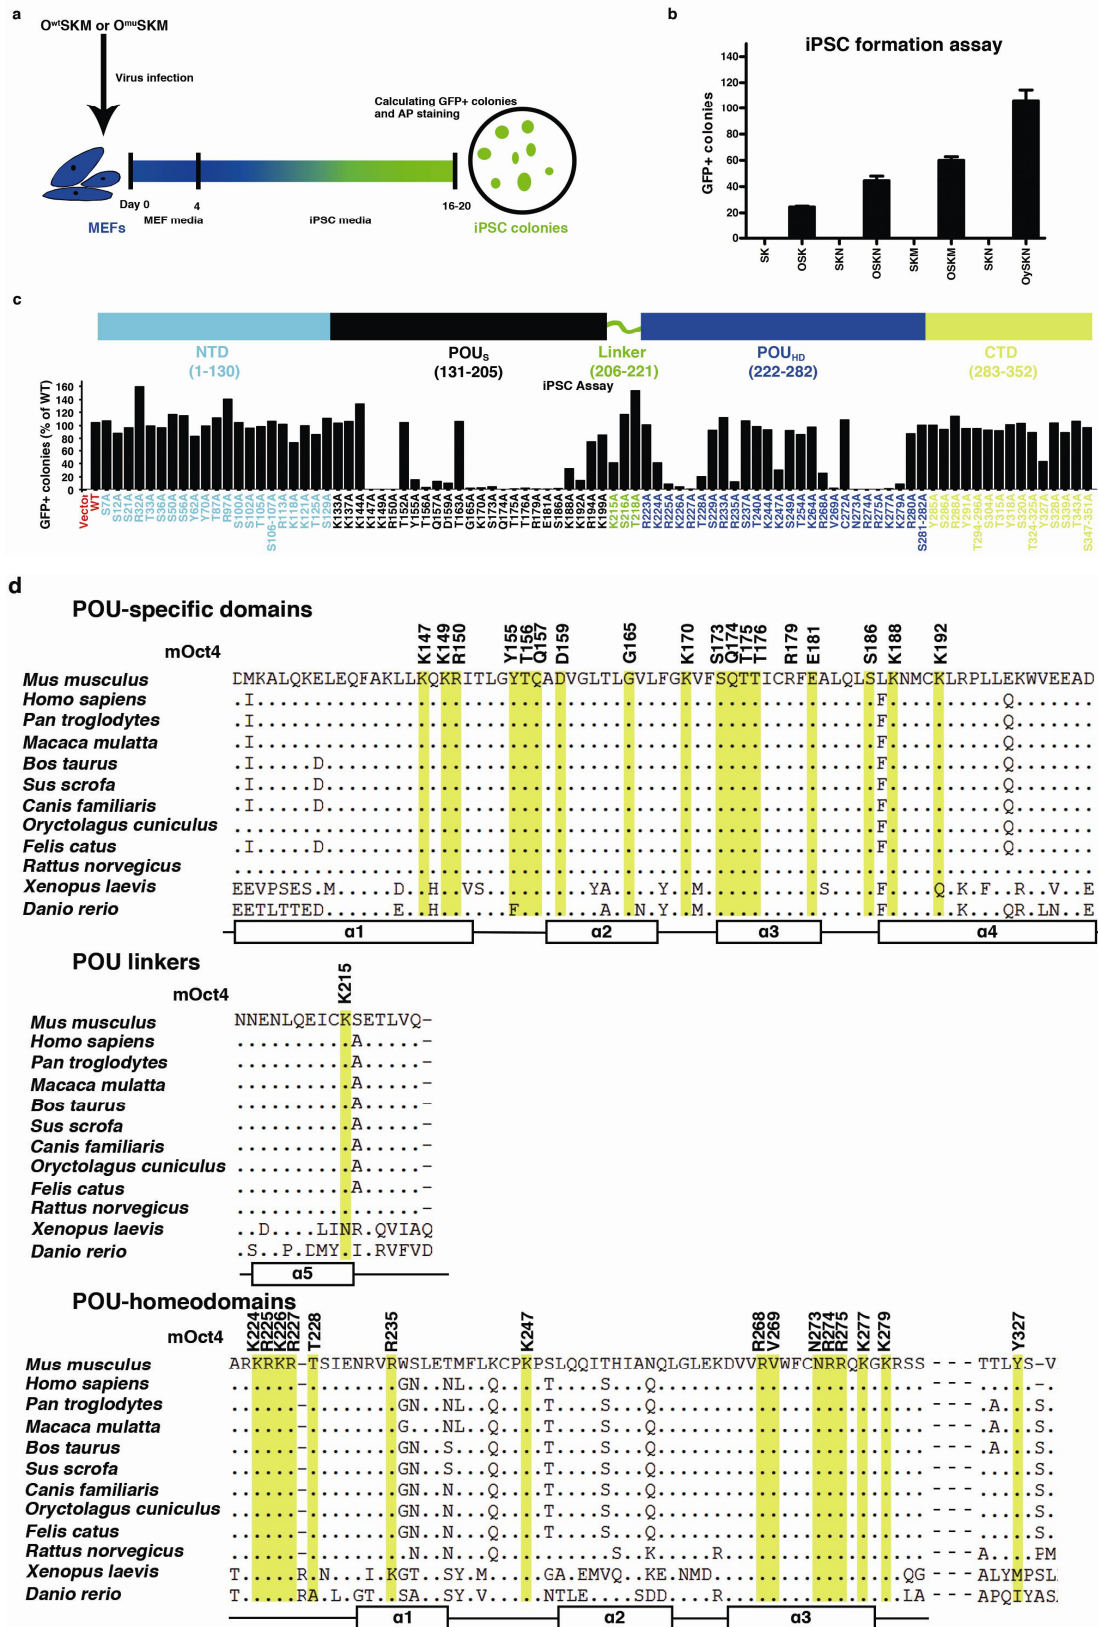

e

**POU-specific domains**

|           |                                                                                              | K147 | K149 | R150 | Y155 | K156 | Q157 | D159 | G165 | K170 | S173 | Q174 | T175 | T176 | R179 | E181 | S186 | K188 | K192 |
|-----------|----------------------------------------------------------------------------------------------|------|------|------|------|------|------|------|------|------|------|------|------|------|------|------|------|------|------|
| mOct4     |                                                                                              |      |      |      |      |      |      |      |      |      |      |      |      |      |      |      |      |      |      |
| pou5f1    | IMKALQKELEQ-FAKLLKQKRITLGYTCADVGLTLG--VLF GK-VFSQTTICR-----FEALQLSLKNNMCKLRPL-LEKWEV EAD---- |      |      |      |      |      |      |      |      |      |      |      |      |      |      |      |      |      |      |
| pou5f1(h) | .I.....A.....Q.....                                                                          |      |      |      |      |      |      |      |      |      |      |      |      |      |      |      |      |      |      |
| pou1f1    | MDSPEIR.....NEF.VR..K...TN..EA.A--AVH.S-E.....N...F...A...KAI..S.L...E.....                  |      |      |      |      |      |      |      |      |      |      |      |      |      |      |      |      |      |      |
| pou2f1    | EEPSDLE.....TF..R..K.F.F.G...AM--K.Y.N-D.....S.....N...F...K...LND.E----                     |      |      |      |      |      |      |      |      |      |      |      |      |      |      |      |      |      |      |
| pou2f2    | EEPSDLE.....RTF..R..K.F.F.G...AM--K.Y.N-D.....S.....N...F...K...LND.E----                    |      |      |      |      |      |      |      |      |      |      |      |      |      |      |      |      |      |      |
| pou2f3    | .EPTDLE...K...TF..R..K.F.F.G...AM--K.Y.N-D.....S.....N...F...K...LND.E----                   |      |      |      |      |      |      |      |      |      |      |      |      |      |      |      |      |      |      |
| pou3f1    | ECAPSSDD.....QF..R..K.F.F...A...T.Y.N.....S.....F...K...N.L.T.----                           |      |      |      |      |      |      |      |      |      |      |      |      |      |      |      |      |      |      |
| pou3f2    | EDTPTSDD.....QF..R..K.F.F...A...T.Y.N.....S.....F...K...N.L.T.----                           |      |      |      |      |      |      |      |      |      |      |      |      |      |      |      |      |      |      |
| pou3f3    | EDTPTSDD.....QF..R..K.F.F...A...T.Y.N.....S.....F...K...N.L.T.----                           |      |      |      |      |      |      |      |      |      |      |      |      |      |      |      |      |      |      |
| pou3f4    | EETPTSDD.....QF..R..K.F.F...A...T.Y.N.....S.....F...K...N.L.T.----                           |      |      |      |      |      |      |      |      |      |      |      |      |      |      |      |      |      |      |
| pou4f1    | .SDTDP R...A...ERF..R..K.V...SA.ANLKIP.VGSL.S...S.T.HN..IA.K.I-.CA.L..E----                  |      |      |      |      |      |      |      |      |      |      |      |      |      |      |      |      |      |      |
| pou4f2    | .VD.DPRD..A...ERF..R..K.V...SA.ANLKIP.VGSL.S...S.T.HN..IA.K.I-.CA.L..E EKSHR                 |      |      |      |      |      |      |      |      |      |      |      |      |      |      |      |      |      |      |
| pou4f3    | .VESDPR..A...ERF..R..K.V...AA.ANLKIP.VGSL.S...S.T.HN..IA.K.V-.CA.L..E                        |      |      |      |      |      |      |      |      |      |      |      |      |      |      |      |      |      |      |
| pou5f2    | .VS.I...M...L.E.R...M...S...FAV--AM...L...Q...A.W...-KM.L.V.----                             |      |      |      |      |      |      |      |      |      |      |      |      |      |      |      |      |      |      |
| pou6f1    | EDGINLE.IRE...NF.IR.LS..L.TQ..CA.T--ATE.P-AY..SA...K.DITP.SAQ..K.V...LM.E                    |      |      |      |      |      |      |      |      |      |      |      |      |      |      |      |      |      |      |
| pou6f2    | VDGNLE.IRE...AF.IR.LS..L.TQ..CA.S--ATE.P-AY..SA...H--R..K.DITP.SAQ..IK.V-.R.MA.E             |      |      |      |      |      |      |      |      |      |      |      |      |      |      |      |      |      |      |
| pou2af1   | -EYVSHEAVSCPYSTLMVQPVCP S...VVG P SSV.T--YASP LITNV..PRST----ATFAVGPQLLEGPEHCAPLTYF FWPQ---- |      |      |      |      |      |      |      |      |      |      |      |      |      |      |      |      |      |      |

**POU linkers**

|           |                              | K215 |
|-----------|------------------------------|------|
| mOct4     |                              |      |
| pou5f1    | NNENLQEQICKSETLVQ-----       |      |
| pou5f1(h) | .....A.....                  |      |
| pou1f1    | QVGA.YNEKVGANE-----          |      |
| pou2f1    | .LSSDSTASSPSA.NSPGLGAEGLN-   |      |
| pou2f2    | TMSVDSSLSPNQ.SSPSLGFDGLPG    |      |
| pou2f3    | SSSPDPSASTPSSYP T LSEVFG---- |      |
| pou3f1    | SSSGSPTNLDKIAAQG-----        |      |
| pou3f2    | SSSGSPTSIDKIAAQG-----        |      |
| pou3f3    | SSTGSPTSIDKIAAQG-----        |      |
| pou3f4    | SSTGSPTSIDKIAAQ-----         |      |
| pou4f1    | GAQREKMNKPELFNGG-----        |      |
| pou4f2    | EKLTKP.LFN GA-----           |      |
| pou4f3    | AAYREKNSKPELFNGS-----        |      |
| pou5f2    | EKNL.GICRMEMI.E.-----        |      |
| pou6f1    | LRNQEGQQNLM.FVGGEPS-----     |      |
| pou6f2    | ARHRAGMQNLT.FIGSEPS-----     |      |
| pou2af1   | PLST.PTSSSLQYQPP-----        |      |

**POU-homeodomains**

|           |                                                                                      | K224 | R225 | R226 | R227 | R228 | R235 | K247 | R268 | V269 | N273 | R274 | R275 | K277 | K279 | Y327 |
|-----------|--------------------------------------------------------------------------------------|------|------|------|------|------|------|------|------|------|------|------|------|------|------|------|
| mOct4     |                                                                                      |      |      |      |      |      |      |      |      |      |      |      |      |      |      |      |
| pou5f1    | ARKRRKRTSIENVRVRSLETMFLKCPKPSLQQITHIANQLGLEKDVVVRVWFCNRRQRGKRSS- - - - T T L Y S - V |      |      |      |      |      |      |      |      |      |      |      |      |      |      |      |
| pou5f1(h) | .....GN..NL..Q...T...S...Q.....A...S.                                                |      |      |      |      |      |      |      |      |      |      |      |      |      |      |      |
| pou1f1    | RKRKR..T.SVAAKDA..RH.GEHS...S.E.MRM.EE.N...E.....R E..VK-----SAST.EA                 |      |      |      |      |      |      |      |      |      |      |      |      |      |      |      |
| pou2f1    | R.RK.....TNI.VA..KS.MENQ..TSED..L.E.NM..E.I.....E..IN---GGGGGG                       |      |      |      |      |      |      |      |      |      |      |      |      |      |      |      |
| pou2f2    | R.RK.....TN..FA..KS..ANQ..TSEE.LL..E..HM..E.I.....E..IN---SG.HASS                    |      |      |      |      |      |      |      |      |      |      |      |      |      |      |      |
| pou2f3    | RKRK.....TNI.LT..KR.QDN...SEE.SM..E..SM..E.....E..IN---HHHHHTL                       |      |      |      |      |      |      |      |      |      |      |      |      |      |      |      |
| pou3f1    | RKRK.....VG.KGA..SH.....AHE..GL.DS.Q...E.....E..MT---HHGL                            |      |      |      |      |      |      |      |      |      |      |      |      |      |      |      |
| pou3f2    | RKRK.....VS.KGA..SH.....A.E..SL.DS.Q...E.....E..MT---SCHD                            |      |      |      |      |      |      |      |      |      |      |      |      |      |      |      |
| pou3f3    | RKRK.....VS.KGV...H.....AA.E.SSL.DS.Q...E.....E..MT---MKY                            |      |      |      |      |      |      |      |      |      |      |      |      |      |      |      |
| pou3f4    | RKRK.....VS.KGV...H.....AA.E.SSL.DS.Q...E.....E..MT---MKY                            |      |      |      |      |      |      |      |      |      |      |      |      |      |      |      |
| pou4f1    | EK.....AAPEKR...AY.AVQ.R..SEK.AA..EK.D.K.N.....Q...Q..MKY                            |      |      |      |      |      |      |      |      |      |      |      |      |      |      |      |
| pou4f2    | EK.....AAPEKR...AY.AIQ.R..SEK.AA..EK.D.K.N.....Q...Q..MKY                            |      |      |      |      |      |      |      |      |      |      |      |      |      |      |      |
| pou4f3    | E.....AAPEKR...AY.AIQ.R..SEK.AA..EK.D.K.N.....Q...Q..MKY                             |      |      |      |      |      |      |      |      |      |      |      |      |      |      |      |
| pou5f2    | -...R.A.R.R..IGSN..KL..Q..E.TP...SY..GR.R.Q..L.Q...S..S.M.SWPT---.P...ST             |      |      |      |      |      |      |      |      |      |      |      |      |      |      |      |
| pou6f1    | KKRKR...FTPQAIEA.NAY.E.N.L.TG.E..E..KE.NYDRE.....TL.NT.---                           |      |      |      |      |      |      |      |      |      |      |      |      |      |      |      |
| pou6f2    | KKRKR...FTPQALEI.NAH.E.NTH..G.EM.E..EK.NYDRE.....K..AL.NTI.---                       |      |      |      |      |      |      |      |      |      |      |      |      |      |      |      |
| pou2af1   | .PTLSGPFQVQLPISIP.PVLQMDD.RRAISSLTIDK.L.EEESNTYEL.H T L S V E G F-----               |      |      |      |      |      |      |      |      |      |      |      |      |      |      |      |

f

| DNA      | AA     |  | K147 | K192 | K247 | K277 | K279 | R150 | R179 | R227 | R268 | R275 |
|----------|--------|--|------|------|------|------|------|------|------|------|------|------|
|          | H-bond |  |      |      |      |      |      |      |      |      |      |      |
| backbone |        |  | ✓    | ✓    | ✓    | ✓    | ✓    | ✓    |      |      | ✓    | ✓    |
| base     |        |  |      |      |      |      |      |      | ✓    | ✓    |      |      |

g

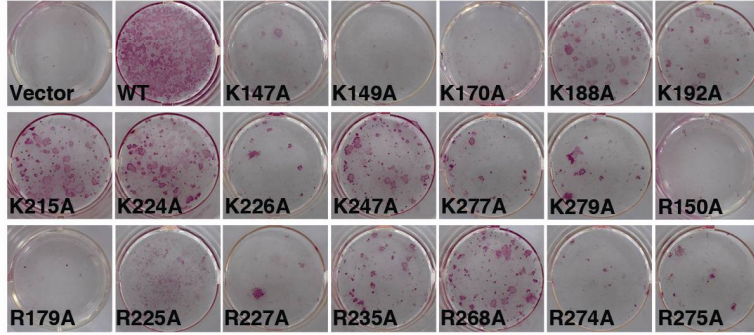

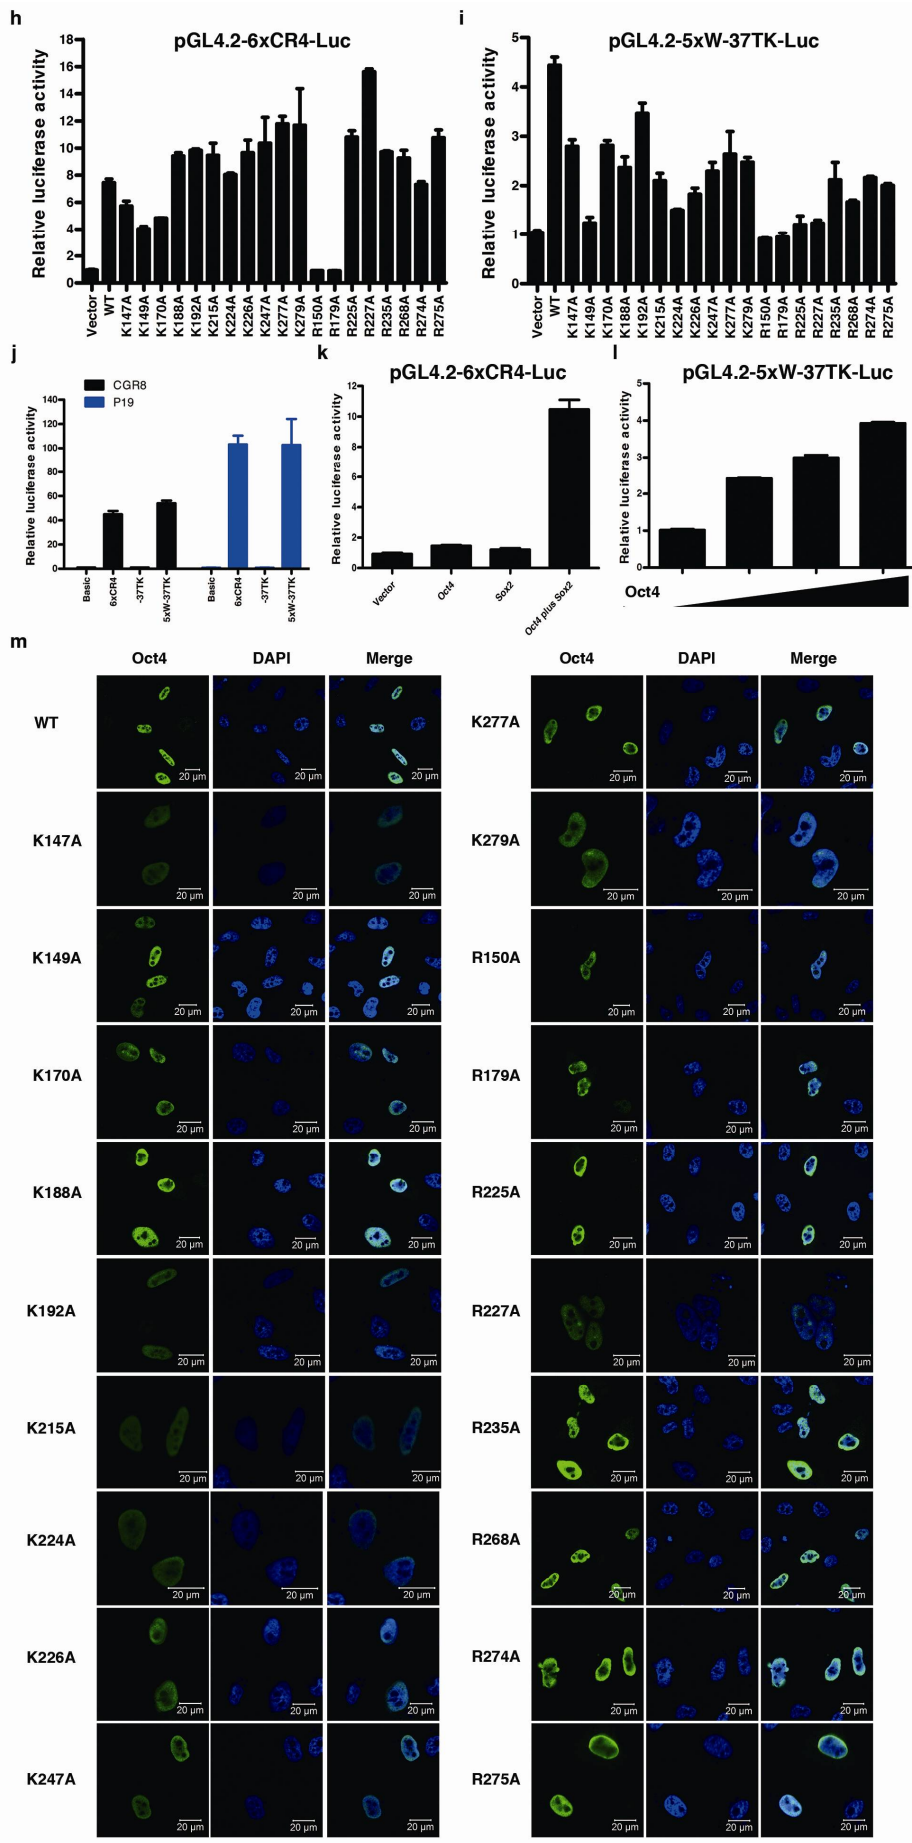

**Supplementary Figure S1** Identification of critical Oct4 residues for somatic cell reprogramming by alanine scanning.

(a) Schematic of experimental designs for library construction of mOct4 mutants and identification of the functional residues required for reprogramming activity.

(b) GFP<sup>+</sup> iPSC formation by different combination of reprogramming factors. Data are representative of two independent experiments. Statistics analysis was performed using a t-test (mean and s.d. of duplicate assays).

(c) Percentage of GFP<sup>+</sup> iPSC formation by the 90 mOct4 alanine mutants in the library. Data are representative of at least two independent reprogramming experiments for each mutant.

(d) Sequence alignment of 12 different Oct4 POU proteins. Residues that are defective in reprogramming after mutating to alanine are highlighted in yellow.

(e) Sequence alignment of 16 different murine POU proteins. Residues that are defective in reprogramming after mutating to alanine are highlighted in yellow.

(f) Table to show the interaction between K/R residues and DNA in Figure 1b.

(g) AP staining of OSKM-based reprogramming defective Oct4 K-to-A and R-to-A mutants.

(h and i) The relative transcriptional activities of reprogramming defective K-to-A and R-to-A mutants were measured using 6xCR4-Luc and 5xW-Luc reporters, respectively. Data are representative of at least three independent experiments. Statistics analysis was performed using a t-test (mean and s.d. of duplicate assays).

(j) Test of the 6xCR4-Luc or 5xW-Luc reporters in CGR8 ES cells and P19 EC cells. The Basic or -37TK luciferase enhancer-less vectors were served as negative controls.

(k) Test of the 6xCR4-Luc in HEK293 cells. 6xCR4-Luc was transfected into HEK293 cells together with a mock vector, Oct4, Sox2, or Oct4 plus Sox2.

**(l)** Test of 5xW-Luc in HEK293 cells. 5xW-Luc was transfected into HEK293 cells together with a mock vector or increasing amounts of Oct4. A pRL-CMV renilla reporter was included in all transfection for normalization. Data (**j**, **k** and **l**) are representative of three independent experiments. Statistics analysis was performed using a t-test (mean and s.d. of duplicate assays).

**(m)** Nuclear localization of reprogramming defective mOct4 K-to-A and R-to-A mutants. K-to-A and R-to-A mutants were transfected into HeLa cells grown on coverslips. Immunostaining of Oct4 was performed 36 h after transfection with DAPI counterstaining.



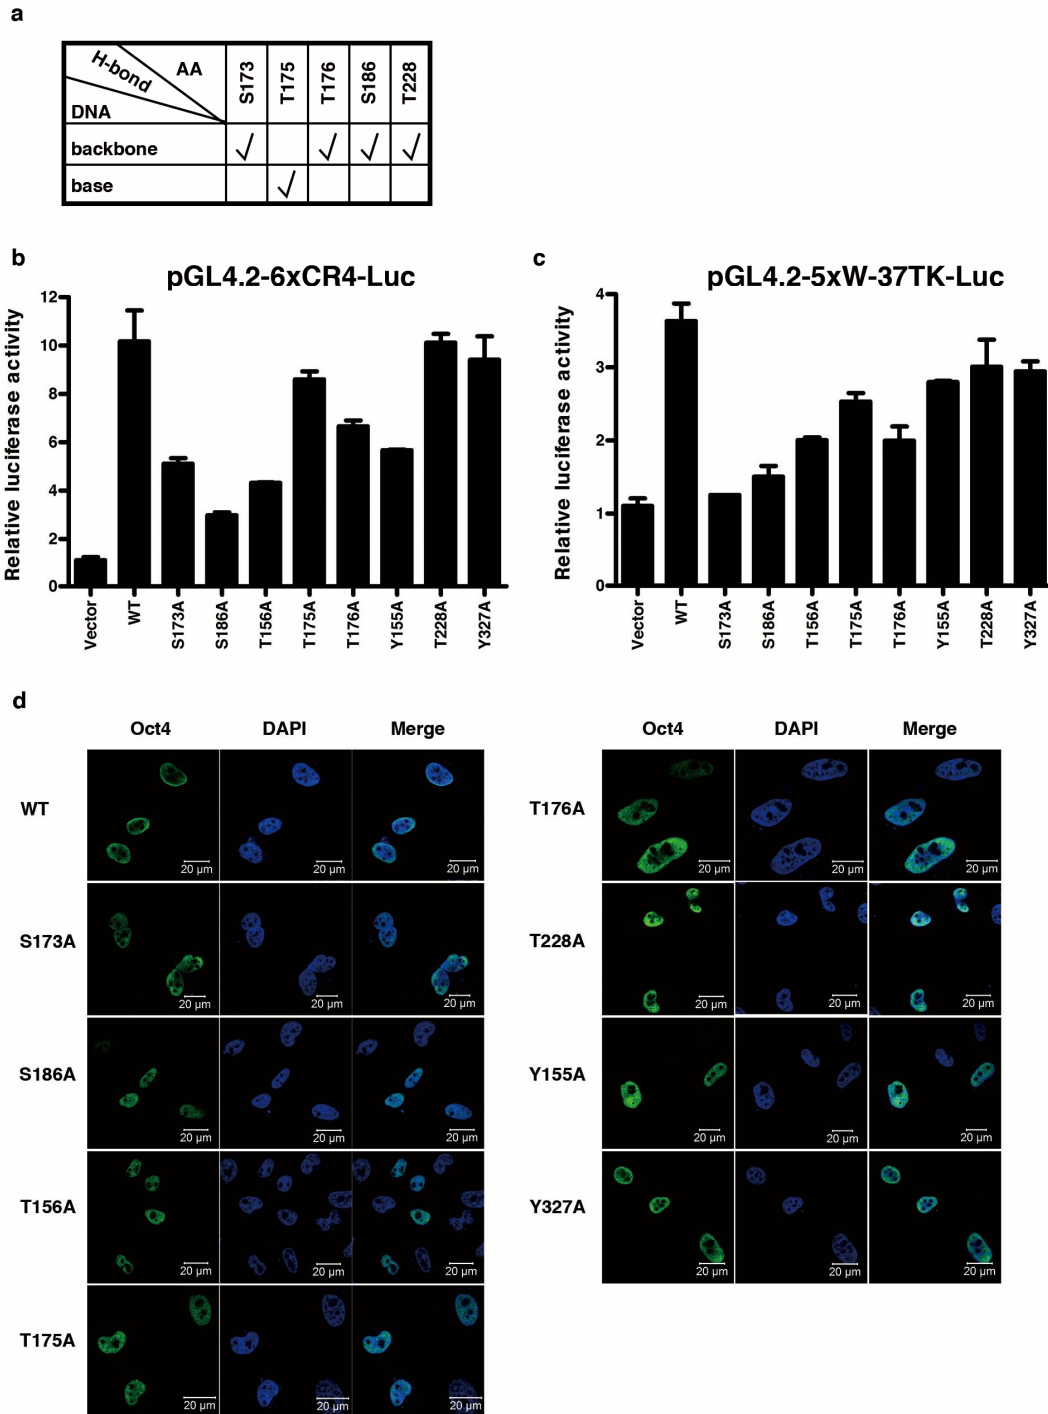

**Supplementary Figure S2** Characterization of reprogramming defective mOct4 S-to-A, T-to-A and Y-to-A mutants.

(a) Table to show the interaction between S/T/Y residues and DNA in Figure 2b.

(b and c) The relative transcriptional activities of reprogramming defective S-to-A, T-to-A and Y-to-A mutants were measured using 6xCR4-Luc and 5xW-Luc reporters,



respectively. Data are representative of at least three independent experiments. Statistics analysis was performed using a t-test (mean and s.d. of duplicate assays).

**(d)** Nuclear localization of reprogramming defective mOct4 S-to-A, T-to-A and Y-to-A mutants. The mutants were transfected into HeLa cells grown on coverslips. Immunostaining of Oct4 was performed 36 h after transfection with DAPI counterstaining.

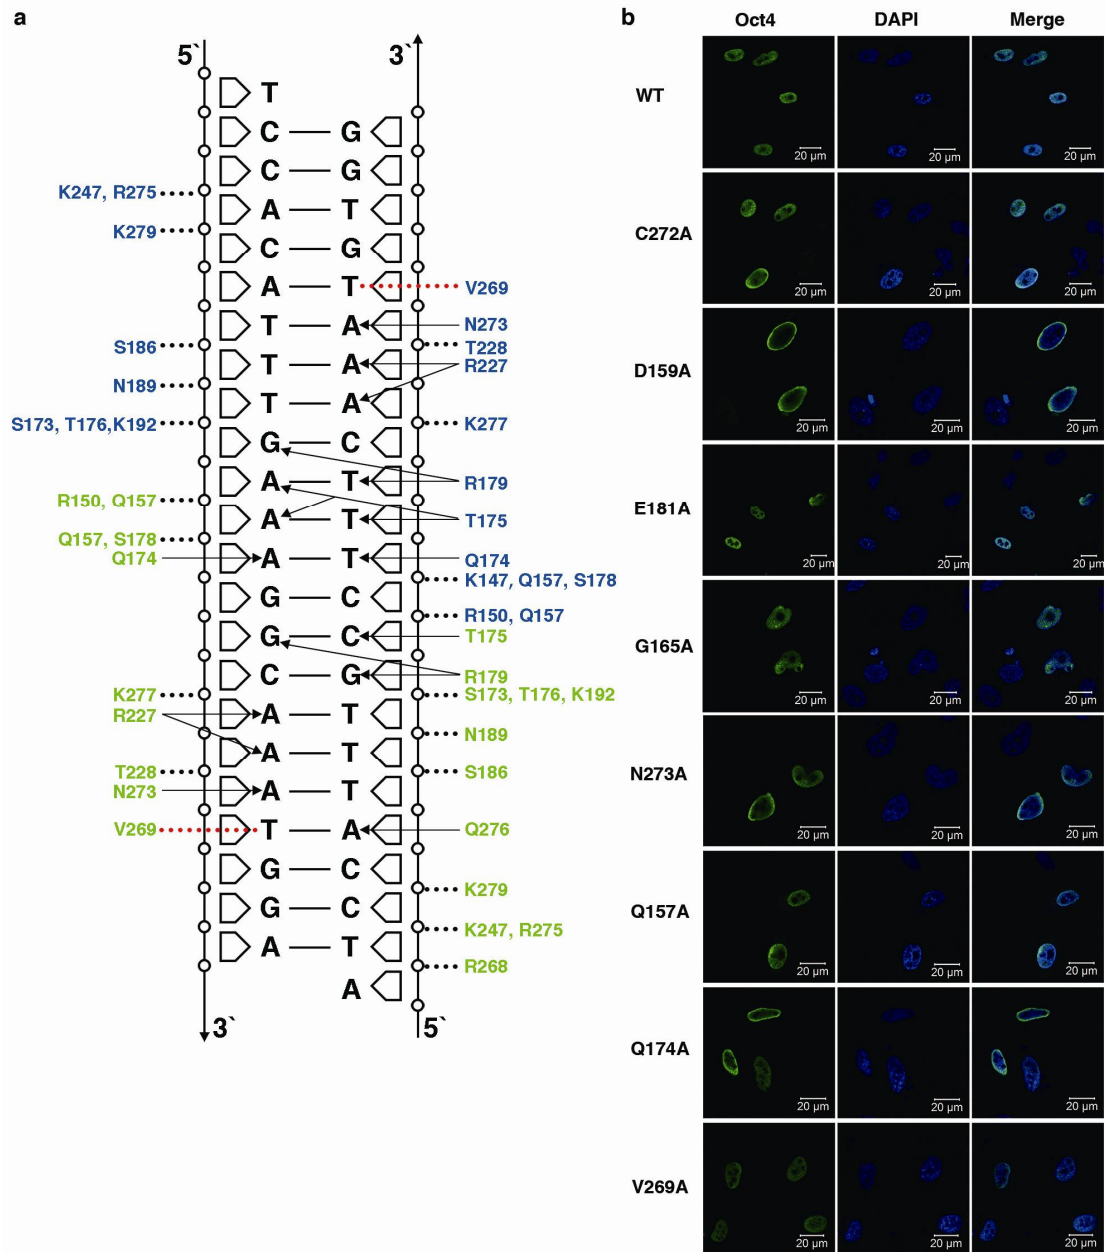

**Supplementary Figure S3** Characterization of mOct4 critical DNA binding residues.

(a) A sketch showing interactions or non-polar contacts between mOct4 residues and DNA in model of Oct4<sup>POU</sup>:PORE complex. In the figure, interacting residues within the chain A (3L1P) are in blue, while interacting residues within the chain B are in green. Hydrogen bonds are shown by black dot lines for residues interacting with DNA phosphate and by solid arrows for those with DNA base. Non-polar contacts are shown by red dot lines.

**(b)** Nuclear localization of reprogramming defective mOct4 mutants. The mutants were transfected into HeLa cells grown on coverslips. Immunostaining of Oct4 was performed 36 h after transfection with DAPI counterstaining.

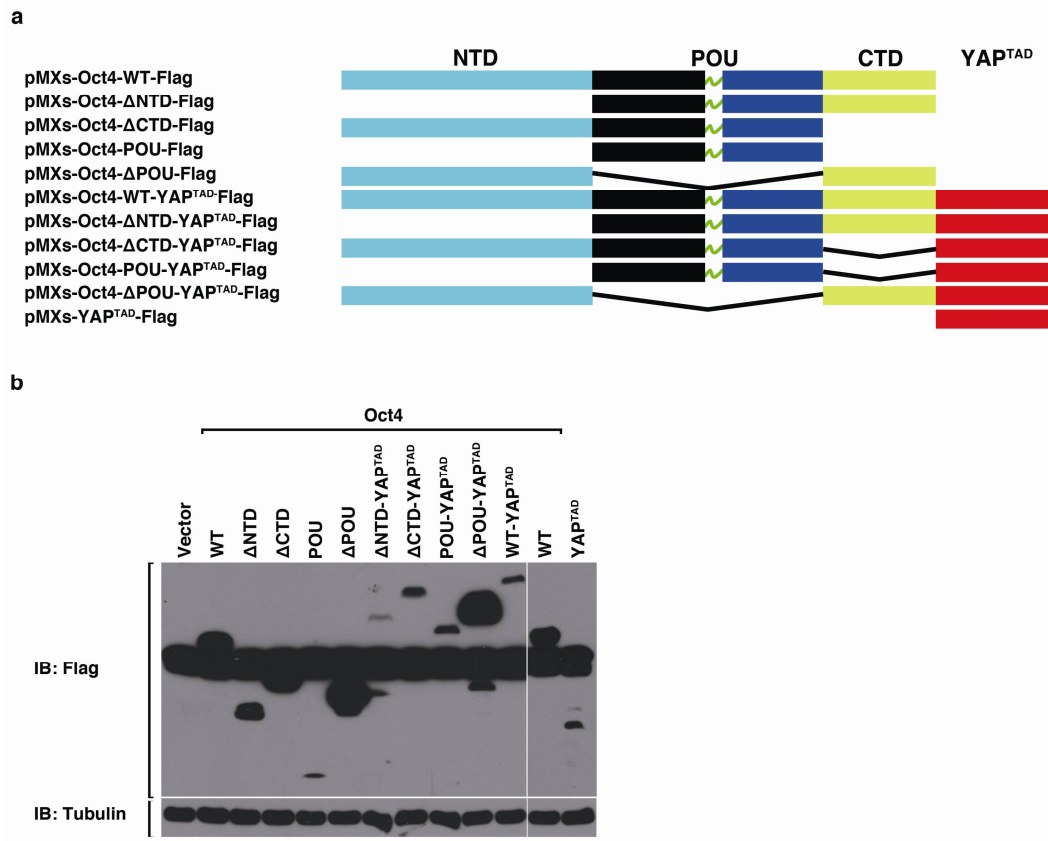

**Supplementary Figure S4** POU domain of Oct4 is the minimal requirement for generating iPS cells.

(a) Diagrams of Oct4 WT, WT-YAP<sup>TAD</sup> and their deletion constructs.

(b) Protein stability of Oct4 WT, WT-YAP<sup>TAD</sup> and their deletion constructs in MEFs.

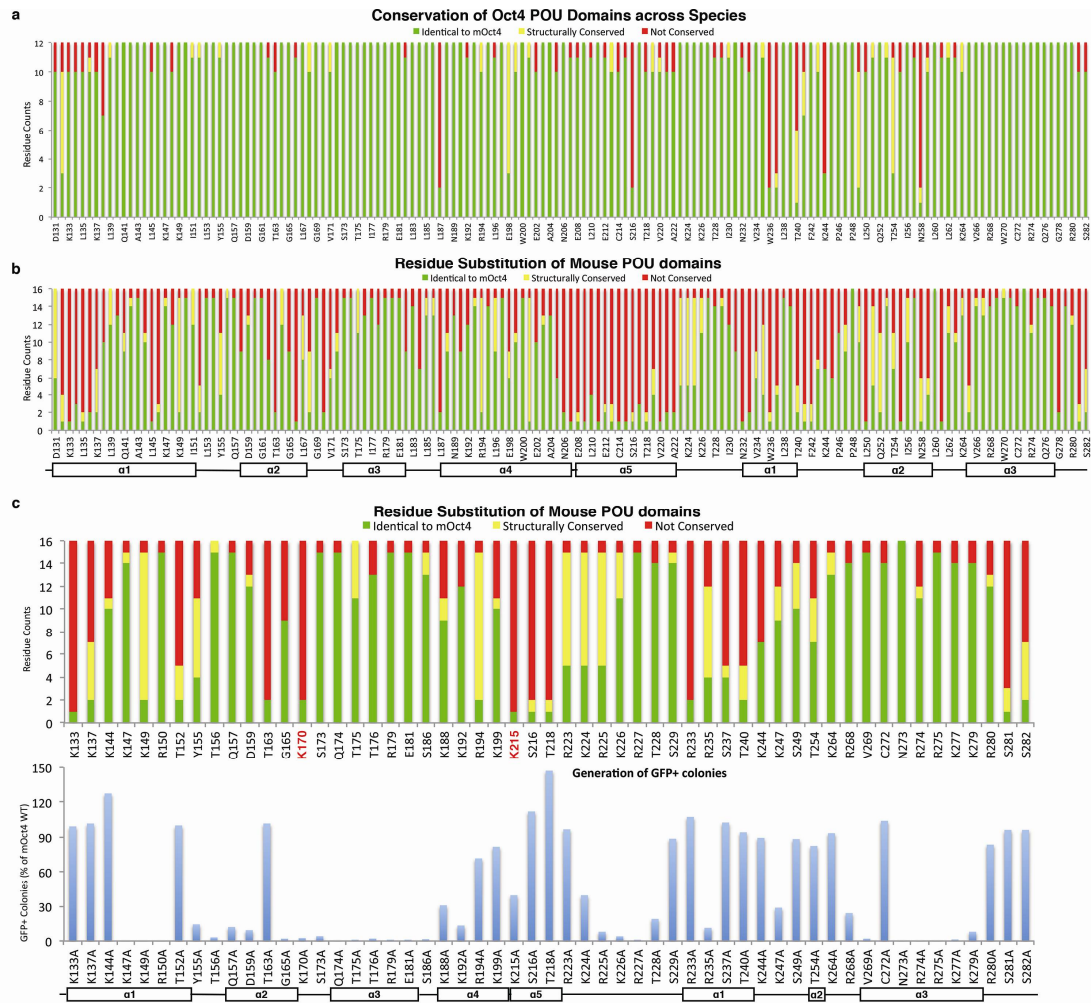

**Supplementary Figure S5** Specific residues make Oct4 unique in reprogramming.

(a) Conservation of Oct4 POU domains across 12 species. The numbering is in accord with mOct4.

(b) Residue substitution among the 16 murine POU domain-containing members. The numbering is in accord with mOct4.

(c) Substitution of residues tested in our alanine mutant library collection among the 16 murine POU domain-containing members. For easier viewing, the effects of the Oct4 mutants in iPSC assay are shown in the bottom panel. The numbering is in accord with mOct4.

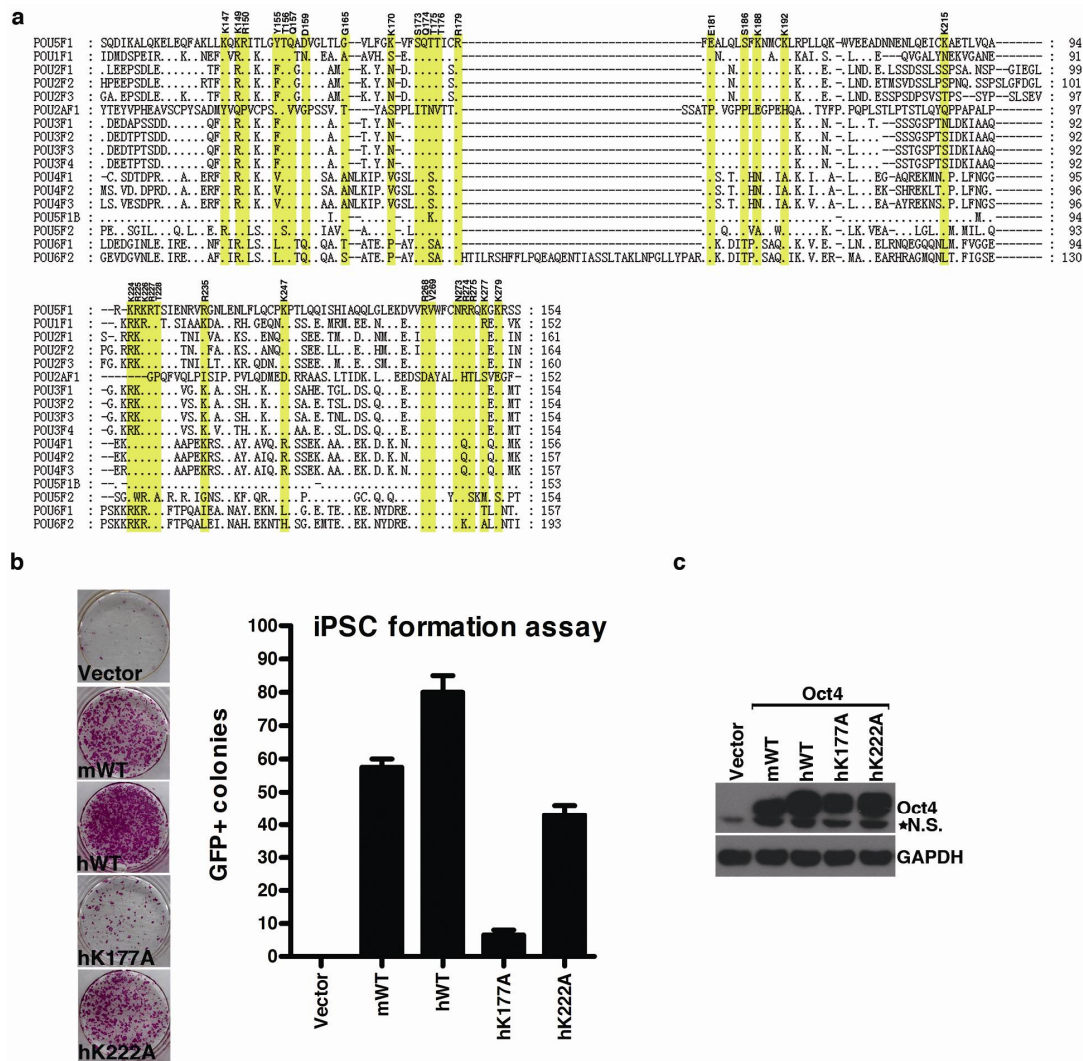

**Supplementary Figure S6** Specific residues make human Oct4 unique in reprogramming.

(a) Sequence alignment of human POU domain-containing proteins. The numbering at the top is according to mouse Oct4 numbering.

(b) AP staining of GFP+ colonies formed by human Oct4 WT, K177A and K222A mutants. Counting of GFP+ colonies is shown at the right. Data are representative of two independent experiments. Statistics analysis was performed using a t-test (mean and s.d. of duplicate assays).

(c) Protein stability of hOct4 WT, the K177A and the K222A mutants in MEF cells.

**Supplementary Table 1: Summary of key Oct4 residues**

| GFP+ clonies(% of WT) |  | Defective residues information (compared to WT) |       |     | Oct4 <sup>POU</sup> :PORE complex crystal structure (3L1P) was analyzed using Pymol software and analysis results are shown below. |                                                                                                                                              |                                                                 |                                                                                                                                                                                                                                                                      | putative or reported post translation modification sites |        |
|-----------------------|--|-------------------------------------------------|-------|-----|------------------------------------------------------------------------------------------------------------------------------------|----------------------------------------------------------------------------------------------------------------------------------------------|-----------------------------------------------------------------|----------------------------------------------------------------------------------------------------------------------------------------------------------------------------------------------------------------------------------------------------------------------|----------------------------------------------------------|--------|
|                       |  | Reporter assay                                  |       |     |                                                                                                                                    |                                                                                                                                              |                                                                 |                                                                                                                                                                                                                                                                      | PTM sites                                                | Source |
|                       |  | Protein stability in MEF                        | 6xCR4 | 5xW | Localization in nucleus                                                                                                            | based on POU domain highly conserved between POU family members and available 1HF0 crystal structure, we repaired side chains of K188, K192, | Residues directly interact with DNA(backbone phosphate or base) | Residues directly interacting with functional residues are shown in black which were not tested in this study, and in blue which were already included in our iPSC screening and shown strong defects in reprogramming experiments. Five C to S mutants from crystal |                                                          |        |



|        |            |  |  |  |  |  |                                       |  |                                |                                  |                                      |
|--------|------------|--|--|--|--|--|---------------------------------------|--|--------------------------------|----------------------------------|--------------------------------------|
|        |            |  |  |  |  |  | K226,<br>K277 and<br>K279 in<br>3L1P. |  | structure are<br>shown in red. |                                  |                                      |
| Vector | 0          |  |  |  |  |  |                                       |  |                                |                                  |                                      |
| WT     | 100        |  |  |  |  |  |                                       |  |                                |                                  |                                      |
| S7A    | 102.5<br>3 |  |  |  |  |  |                                       |  |                                |                                  |                                      |
| S12A   | 84.18      |  |  |  |  |  |                                       |  |                                | putative<br>phosphorylation site | PhosphoSite<br>Plus                  |
| S21A   | 92.41      |  |  |  |  |  |                                       |  |                                |                                  |                                      |
| R32A   | 152.9<br>4 |  |  |  |  |  |                                       |  |                                |                                  |                                      |
| T33A   | 95.06      |  |  |  |  |  |                                       |  |                                |                                  |                                      |
| S36A   | 92.41      |  |  |  |  |  |                                       |  |                                |                                  |                                      |
| S50A   | 112.0<br>3 |  |  |  |  |  |                                       |  |                                |                                  |                                      |
| S56A   | 110.1<br>3 |  |  |  |  |  |                                       |  |                                |                                  |                                      |
| Y62A   | 79.75      |  |  |  |  |  |                                       |  |                                |                                  |                                      |
| Y70A   | 94.94      |  |  |  |  |  |                                       |  |                                |                                  |                                      |
| T87A   | 106.9<br>6 |  |  |  |  |  |                                       |  |                                | reported<br>phosphorylation site | <i>Proc. Natl.<br/>Acad. Sci. U.</i> |

|               |            |  |  |  |  |  |  |  |  |                                                                            |                                                                                                                                        |
|---------------|------------|--|--|--|--|--|--|--|--|----------------------------------------------------------------------------|----------------------------------------------------------------------------------------------------------------------------------------|
|               |            |  |  |  |  |  |  |  |  | in human ES cells<br>(human Oct4-T92)                                      | S. A.<br><b>109</b> :7162-<br>7168.                                                                                                    |
| R97A          | 134.5<br>7 |  |  |  |  |  |  |  |  |                                                                            |                                                                                                                                        |
| S100A         | 100        |  |  |  |  |  |  |  |  | reported<br>phosphorylation site<br>in human ES cells<br>(human Oct4-S105) | <i>Proc. Natl.<br/>Acad. Sci. U.<br/>S. A.</i><br><b>109</b> :7162-<br>7168.                                                           |
| S102A         | 91.77      |  |  |  |  |  |  |  |  | reported<br>phosphorylation site<br>in human ES cells<br>(human Oct4-S107) | <i>Proc. Natl.<br/>Acad. Sci. U.<br/>S. A.</i><br><b>109</b> :7162-<br>7168.                                                           |
| T105A         | 94.12      |  |  |  |  |  |  |  |  |                                                                            |                                                                                                                                        |
| S106-<br>107A | 101.9      |  |  |  |  |  |  |  |  | reported<br>phosphorylation site<br>in human ES cells<br>(human Oct4-S111) | <i>Proc. Natl.<br/>Acad. Sci. U.<br/>S. A.</i><br><b>109</b> :7162-<br>7168, <i>J. Biol.<br/>Chem.</i><br><b>287</b> :38279-<br>38288. |
| R113A         | 97.5       |  |  |  |  |  |  |  |  |                                                                            |                                                                                                                                        |
| K118A         | 70.34      |  |  |  |  |  |  |  |  | reported sumoylation<br>site                                               | <i>J. Bio. Chem.</i><br><b>282</b> :21551-<br>21560;<br><i>FASEB J.</i><br><b>21</b> :3042-51.                                         |
| K121A         | 95.33      |  |  |  |  |  |  |  |  |                                                                            |                                                                                                                                        |
| T125A         | 82.35      |  |  |  |  |  |  |  |  |                                                                            |                                                                                                                                        |
| S129A         | 106.3<br>3 |  |  |  |  |  |  |  |  |                                                                            |                                                                                                                                        |

|       |        |               |               |               |     |                      |  |                                      |                                  |                               |                  |
|-------|--------|---------------|---------------|---------------|-----|----------------------|--|--------------------------------------|----------------------------------|-------------------------------|------------------|
| K133A | 99.17  |               |               |               |     |                      |  |                                      |                                  | putative ubiquitination site  | PhosphoSite Plus |
| K137A | 101.67 |               |               |               |     |                      |  |                                      |                                  | putative ubiquitination site  | PhosphoSite Plus |
| K144A | 127.5  |               |               |               |     |                      |  | H-bond to backbone phosphate (4.4 Å) |                                  | putative ubiquitination site  | PhosphoSite Plus |
| K147A | 0      | low           | low           | low           | YES |                      |  |                                      | H-bond to A143, I151             |                               |                  |
| K149A | 0      | extremely low | low           | extremely low | YES |                      |  |                                      | H-bond to L-145, L146, L153      |                               |                  |
| R150A | 0      | low           | extremely low | extremely low | YES |                      |  | H-bond to backbone phosphate         | H-bond to L146, G154, Y155, E181 |                               |                  |
| T152A | 100    |               |               |               |     |                      |  |                                      |                                  |                               |                  |
| Y155A | 14.36  | slightly low  | low           | slightly low  | YES |                      |  |                                      | H-bond to R150, E208, Q211       |                               |                  |
| T156A | 3.08   | slightly low  | low           | low           | YES |                      |  |                                      | H-bond to D159, V160             | putative phosphorylation site | PhosphoSite Plus |
| Q157A | 12     | normal        | extremely low | extremely low | YES |                      |  | H-bond to backbone phosphate         | H-bond to G161, E181             |                               |                  |
| D159A | 9.33   | normal        | slightly low  | slightly low  | YES |                      |  |                                      | H-bond to T156, T163, K215       |                               |                  |
| T163A | 101.67 |               |               |               |     |                      |  |                                      |                                  |                               |                  |
| G165A | 2      | normal        | slightly low  | slightly low  | YES |                      |  |                                      | H-bond to L162, G169             |                               |                  |
| K170A | 2.5    | normal        | slightly low  | slightly low  | YES | K side chain missing |  |                                      |                                  |                               |                  |
| S173A | 4.1    | slightly low  | low           | extremely low | YES |                      |  | H-bond to backbone                   | H-bond to T176, I177             | putative phosphorylation site | PhosphoSite Plus |

|       |       |                  |                   |                   |     |                                |                            |                                                                              |                                     |  |  |
|-------|-------|------------------|-------------------|-------------------|-----|--------------------------------|----------------------------|------------------------------------------------------------------------------|-------------------------------------|--|--|
|       |       |                  |                   |                   |     |                                |                            | phospate                                                                     |                                     |  |  |
| Q174A | 0     | normal           | extremel<br>y low | normal            | YES |                                |                            | H-bond to base                                                               | H-bond to S178                      |  |  |
| T175A | 1.03  | normal           | slightly<br>low   | sightly<br>low    | YES |                                |                            | H-bond to base                                                               | H-bond to R179                      |  |  |
| T176A | 2.05  | slightly<br>low  | low               | low               | YES |                                |                            | H-bond to<br>backbone<br>phospate                                            | H-bond to S173,<br>R179, F180       |  |  |
|       |       |                  |                   |                   |     |                                |                            | H-bond to<br>backbone<br>phospate(C178<br>was not analyzed<br>in this study) |                                     |  |  |
| R179A | 0.83  | slightly<br>low  | extremel<br>y low | extremel<br>y low | YES |                                |                            | H-bond to base                                                               | H-bond to T175,<br>T176, L183, Q184 |  |  |
| E181A | 0.67  | low              | extremel<br>y low | extremel<br>y low | YES |                                |                            |                                                                              | H-bond to R150,<br>Q157, I177, S178 |  |  |
| S186A | 1.54  | extremely<br>low | extremel<br>y low | extremel<br>y low | YES |                                |                            | H-bond to<br>backbone<br>phospate                                            | H-bond to N189,<br>M190             |  |  |
| K188A | 30.67 | normal           | normal            | slightly<br>low   | YES | K side<br>chain<br>missin<br>g | side chain<br>was repaired |                                                                              | H-bond to K192                      |  |  |
|       |       |                  |                   |                   |     |                                |                            | H-bond to<br>backbone<br>phospate(N189<br>was not analyzed<br>in this study) |                                     |  |  |
| K192A | 13.33 | normal           | normal            | slightly<br>low   | YES | K side<br>chain<br>missin<br>g | side chain<br>was repaired | H-bond to<br>backbone<br>phospate                                            | H-bond to K188,<br>N189             |  |  |
| R194A | 71.67 |                  |                   |                   |     |                                |                            |                                                                              |                                     |  |  |

|       |        |        |        |               |     |                      |                         |  |                              |                                                                                                          |                                                                                                                                                   |
|-------|--------|--------|--------|---------------|-----|----------------------|-------------------------|--|------------------------------|----------------------------------------------------------------------------------------------------------|---------------------------------------------------------------------------------------------------------------------------------------------------|
| K199A | 81.67  |        |        |               |     |                      |                         |  |                              | putative ubiquitination site                                                                             | PhosphoSite Plus                                                                                                                                  |
| K215A | 39.33  | normal | normal | low           | YES | K side chain missing |                         |  | H-bond to D159, Q211         | putative ubiquitination site                                                                             | PhosphoSite Plus                                                                                                                                  |
| S216A | 112.03 |        |        |               |     |                      |                         |  |                              |                                                                                                          |                                                                                                                                                   |
| T218A | 147.06 |        |        |               |     |                      |                         |  |                              |                                                                                                          |                                                                                                                                                   |
| R223A | 96.67  |        |        |               |     |                      |                         |  |                              |                                                                                                          |                                                                                                                                                   |
| K224A | 39.33  | normal | normal | extremely low | YES | K side chain missing |                         |  |                              |                                                                                                          |                                                                                                                                                   |
| R225A | 8      | normal | normal | extremely low | YES | R side chain missing |                         |  |                              |                                                                                                          |                                                                                                                                                   |
| K226A | 4      | normal | normal | low           | YES | K side chain missing | side chain was repaired |  |                              |                                                                                                          |                                                                                                                                                   |
| R227A | 0.67   | normal | normal | extremely low | YES |                      |                         |  | H-bond to base               |                                                                                                          |                                                                                                                                                   |
| T228A | 18.97  | normal | normal | slightly low  | YES |                      |                         |  | H-bond to backbone phosphate | reported phosphorylation site in human ES and EC cells (human Oct4-T235) and reported glycosylation site | <i>Proc. Natl. Acad. Sci. U. S. A.</i> <b>109</b> :7162-7168, <i>Mol. Cell Stem Cell</i> <b>48</b> :1-14, <i>Cell Stem Cell</i> <b>11</b> :62-74. |
| S229A | 88.61  |        |        |               |     |                      |                         |  |                              | reported                                                                                                 | <i>Proc. Natl.</i>                                                                                                                                |

|       |            |        |        |                   |     |  |  |  |                                    |                                                                |                                                              |
|-------|------------|--------|--------|-------------------|-----|--|--|--|------------------------------------|----------------------------------------------------------------|--------------------------------------------------------------|
|       |            |        |        |                   |     |  |  |  |                                    | phosphorylation site<br>in human ES cells<br>(human Oct4-S236) | <i>Acad. Sci. U.<br/>S. A.</i><br><b>109</b> :7162-<br>7168. |
| R233A | 107.3<br>3 |        |        |                   |     |  |  |  |                                    |                                                                |                                                              |
| R235A | 11.33      | normal | normal | low               | YES |  |  |  |                                    | H-bond to E239,<br>I230                                        |                                                              |
| S237A | 102.5<br>3 |        |        |                   |     |  |  |  |                                    |                                                                |                                                              |
| T240A | 94.12      |        |        |                   |     |  |  |  |                                    |                                                                |                                                              |
| K244A | 89.33      |        |        |                   |     |  |  |  |                                    |                                                                |                                                              |
| K247A | 28.67      | normal | normal | low               | YES |  |  |  | H-bond to<br>backbone<br>phosphate |                                                                |                                                              |
| S249A | 88.26      |        |        |                   |     |  |  |  |                                    |                                                                |                                                              |
| T254A | 82.35      |        |        |                   |     |  |  |  |                                    |                                                                |                                                              |
| K264A | 93.33      |        |        |                   |     |  |  |  |                                    |                                                                |                                                              |
| R268A | 24         | normal | normal | low               | YES |  |  |  | H-bond to<br>backbone<br>phosphate | H-bond to K264,<br>D265, <b>S272</b>                           |                                                              |
| V269A | 2          | normal | normal | sightly<br>low    | YES |  |  |  | non polar contacts<br>with base    | H-bond to D265,<br><b>S272</b> , <b>N273</b>                   |                                                              |
| C272A | 104        | normal | normal | normal            | YES |  |  |  |                                    |                                                                |                                                              |
| N273A | 0          | normal | normal | extremel<br>y low | YES |  |  |  | H-bond to base                     | H-bond to <b>V269</b> ,<br>Q276, <b>K277</b>                   |                                                              |
| R274A | 0          | normal | normal | low               | YES |  |  |  |                                    | H-bond to E239,<br>W270, G278                                  |                                                              |
| R275A | 0          | normal | normal | low               | YES |  |  |  | H-bond to<br>backbone<br>phosphate | H-bond to P246,<br>F271, <b>S272</b> , <b>K279</b>             |                                                              |
|       |            |        |        |                   |     |  |  |  | H-bond to base<br>(Q276 was not    |                                                                |                                                              |

|           |        |        |        |             |     |                      |                         | analyzed in this study)      |                |                                                                   |                                                               |
|-----------|--------|--------|--------|-------------|-----|----------------------|-------------------------|------------------------------|----------------|-------------------------------------------------------------------|---------------------------------------------------------------|
| K277A     | 1.33   | normal | normal | low         | YES | K side chain missing | side chain was repaired | H-bond to backbone phosphate | H-bond to N273 |                                                                   |                                                               |
| K279A     | 8      | normal | normal | low         | YES | K side chain missing | side chain was repaired | H-bond to backbone phosphate | H-bond to R275 |                                                                   |                                                               |
| R280A     | 83.54  |        |        |             |     |                      |                         |                              |                |                                                                   |                                                               |
| S281-282A | 96.2   |        |        |             |     |                      |                         |                              |                | reported phosphorylation site in human ES cells (human Oct4-S288) | <i>Proc. Natl. Acad. Sci. U. S. A.</i> <b>109</b> :7162-7168. |
| Y285A     | 96.2   |        |        |             |     |                      |                         |                              |                |                                                                   |                                                               |
| S286A     | 89.87  |        |        |             |     |                      |                         |                              |                |                                                                   |                                                               |
| R288A     | 109.33 |        |        |             |     |                      |                         |                              |                |                                                                   |                                                               |
| Y291A     | 91.18  |        |        |             |     |                      |                         |                              |                |                                                                   |                                                               |
| T294-296A | 91.18  |        |        |             |     |                      |                         |                              |                |                                                                   |                                                               |
| S304A     | 88.89  |        |        |             |     |                      |                         |                              |                |                                                                   |                                                               |
| T315A     | 87.97  |        |        |             |     |                      |                         |                              |                |                                                                   |                                                               |
| Y318A     | 96.84  |        |        |             |     |                      |                         |                              |                |                                                                   |                                                               |
| S320A     | 98.77  |        |        |             |     |                      |                         |                              |                |                                                                   |                                                               |
| T324-325A | 85.29  |        |        |             |     |                      |                         |                              |                |                                                                   |                                                               |
| Y327A     | 41.14  | normal | normal | sightly low | YES |                      |                         |                              |                | putative phosphorylation site                                     | <i>Plos One</i> <b>4</b> :e4467.                              |
| S328A     | 99.37  |        |        |             |     |                      |                         |                              |                |                                                                   |                                                               |
| S339A     | 85.19  |        |        |             |     |                      |                         |                              |                |                                                                   |                                                               |





**Supplementary Table 2: Vectors, Primers used for library construction**

| Entry clone              | mutagenesis primer pairs              |                                         | LR reaction with pMXs-CHR-ccdB (destination vector) |
|--------------------------|---------------------------------------|-----------------------------------------|-----------------------------------------------------|
|                          | Sense primer                          | Antisense primer                        |                                                     |
| pDONR223-mOct4-WT        |                                       |                                         | pMXs-mOct4-WT                                       |
| pDONR223-mOct4-S7A       | GGACACCTGGCTGCAGACTTCGCCTTCTCAC       | GTGAGAAGGCGAAGTCTGCAGCCAGGTGTCC         | pMXs-mOct4-S7A                                      |
| pDONR223-mOct4-S12A      | GACTTCGCCTTCGCACCCCCACCAGGTG          | CACCTGGTGGGGGTGCGAAGGCGAAGTC            | pMXs-mOct4-S12A                                     |
| pDONR223-mOct4-S21A      | GGGGGTGATGGGGCAGCAGGGCTGGAG           | CTCCAGCCCTGCTGCCCATCACCCCC              | pMXs-mOct4-S21A                                     |
| pDONR223-mOct4-S36A      | CGAACCTGGCTAGCCTTCCAAGGGCCTCC         | GGAGGCCCTTGAAGGCTAGCCAGGTTCCG           | pMXs-mOct4-S36A                                     |
| pDONR223-mOct4-S50A      | GGAATCGGACCAGGCGCAGAGGTATTGGGGATC     | GATCCCCAATACCTCTGCGCCTGGTCCGATTCC       | pMXs-mOct4-S50A                                     |
| pDONR223-mOct4-S56A      | GTATTGGGGATCGCCCCATGTCCGCC            | GGCGGACATGGGGCGATCCCCAATAC              | pMXs-mOct4-S56A                                     |
| pDONR223-mOct4-S100A     | GGAGCACGAGTGGAAGCGAATTCAGAGGGAACC     | GGTTCCTCTGAATTCGTTCCACTCGTGCTCC         | pMXs-mOct4-S100A                                    |
| pDONR223-mOct4-S102A     | CGAGTGGAAAGCAACGCAGAGGGAACCTCCTC      | GAGGAGGTTCCCTCTGCGTTGCTTTCCACTCG        | pMXs-mOct4-S102A                                    |
| pDONR223-mOct4-S106-107A | CTCAGAGGGAACCGCCGCTGAGCCCTGTGCCGAC    | GTCGGCACAGGGCTCAGCGGCGGTTCCCTCTGAG      | pMXs-mOct4-S106-107A                                |
| pDONR223-mOct4-S129A     | CCAACCTCCGAGGAGGCCAGGACATGAAAGCC      | GGCTTTCATGTCTGCTGGGCCTCCTCGGGAGTTGG     | pMXs-mOct4-S129A                                    |
| pDONR223-mOct4-S173A     | GGAAAGGTGTTGCCCCAGACCACCATCTGTCTG     | CGACAGATGGTGGTCTGGGCGAACACCTTTCC        | pMXs-mOct4-S173A                                    |
| pDONR223-mOct4-S186A     | GAGGCCTTGCAGCTCGCCCTTAAGAACATGTG      | CACATGTTCTTAAGGCGAGCTGCAAGGCCTC         | pMXs-mOct4-S186A                                    |
| pDONR223-mOct4-S216A     | CAGGAGATATGCAAAGCGGAGACCCTGGTGCAGG    | CCTGCACCAGGGTCTCCGCTTTCATATCTCCTG       | pMXs-mOct4-S216A                                    |
| pDONR223-mOct4-S229A     | GAGAAAGCGAACTGCCATTGAGAACCGTGTGAGG    | CCTCACACGGTTCTCAATGGCAGTTCGCTTTCTC      | pMXs-mOct4-S229A                                    |
| pDONR223-mOct4-S237A     | CCGTGTGAGGTGGGCTCTGGAGACCATGTTTTC     | GAAACATGGTCTCCAGAGCCCACCTCACACGG        | pMXs-mOct4-S237A                                    |
| pDONR223-mOct4-S249A     | GTGCCCGAAGCCC GCCCTACAGCAGATC         | GATCTGCTGTAGGGCGGGCTTCGGGCAC            | pMXs-mOct4-S249A                                    |
| pDONR223-mOct4-S281-282A | CCAGAAGGGCAAAGAGCAGCTATTGAGTATTCCCAAC | GTTGGGAATACTCAATAGCTGCTCTTTTGCCCTTC TGG | pMXs-mOct4-S281-282A                                |
| pDONR223-mOct4-S286A     | GATCAAGTATTGAGTATGCCCAACGAGAAGAG      | CTCTTCTCGTTGGGCATACTCAATACTTGATC        | pMXs-mOct4-S286A                                    |

|                          |                                                 |                                                |                      |
|--------------------------|-------------------------------------------------|------------------------------------------------|----------------------|
| pDONR223-mOct4-S304A     | GGGGGGGCTGTAGCCTTTCCTCTGCCCCC                   | GGGGGCAGAGGAAAGGCTACAGCCCCCCC                  | pMXs-mOct4-S304A     |
| pDONR223-mOct4-S320A     | CCAGGCTATGGAGCCCCCACTTCACCACAC                  | GTGTGGTGAAGTGGGGGGCTCCATAGCCTGG                | pMXS-mOct4-S320A     |
| pDONR223-mOct4-S328A     | CACCACACTCTACGCAGTCCCTTTTCCTGAGGGC              | GCCCTCAGGAAAAGGGACTGCGTAGAGTGTGGTG             | pMXs-mOct4-S328A     |
| pDONR223-mOct4-S339A     | GAGGCCTTTCGCTGTTCCCGTCACTGCTC                   | GAGCAGTGACGGGAACAGCGGGAAAGGCCTC                | pMXS-mOct4-S339A     |
| pDONR223-mOct4-S347-351A | CACTGCTCTGGGCGCTCCCATGCATGCAAACGA<br>CTACAAAG   | CTTTGTAGTCTGTTTGCATGCATGGGAGCGCCCAG<br>AGCAGTG | pMXS-mOct4-S347-351A |
| pDONR223-mOct4-T33A      | CTGGGTGGATTCTCGAGCCTGGCTAAGCTTCC                | GGAAGCTTAGCCAGGCTCGAGAATCCACCCAG               | pMXS-mOct4-T33A      |
| pDONR223-mOct4-T87A      | GTTGGCGTGGAGGCTTTCAGCCTGAGGGC                   | GCCCTCAGGCTGCAAAGCCTCCACGCCAAC                 | pMXS-mOct4-T87A      |
| pDONR223-mOct4-T105A     | GCAACTCAGAGGGAGCCTCCTCTGAGCCCTG                 | CAGGGCTCAGAGGAGGCTCCCTCTGAGTTGC                | pMXS-mOct4-T105A     |
| pDONR223-mOct4-T125A     | GAGAAGGTGGAACCAGCTCCCGAGGAGTCCC                 | GGGACTCCTCGGGAGCTGGTTCCACCTTCTC                | pMXS-mOct4-T125A     |
| pDONR223-mOct4-T152A     | GCAGAAGAGGATCGCCTTGGGGTACACCCAG                 | CTGGGTGTACCCCAAGGCGATCCTCTTCTGC                | pMXs-mOct4-T152A     |
| pDONR223-mOct4-T156A     | CACCTTGGGGTACGCCAGGCCGACGTG                     | CACGTCCGGCCTGGGCGTACCCCAAGGTG                  | pMXs-mOct4-T156A     |
| pDONR223-mOct4-T163A     | GACGTGGGGCTCGCCCTGGGCGTTCTC                     | GAGAACGCCAGGGCGAGCCCCACGTC                     | pMXs-mOct4-T163A     |
| pDONR223-mOct4-T175A     | GGTGTTTCAGCCAGGCCACCATCTGTGCTTTCGA<br>GG        | CCTCGAAGCGACAGATGGTGGCCTGGCTGAACAC<br>C        | pMXs-mOct4-T175A     |
| pDONR223-mOct4-T176A     | GGTGTTTCAGCCAGCCGACCATCTGTGCTTTCGA<br>GG        | CCTCGAAGCGACAGATGGCGGTCTGGCTGAACAC<br>C        | pMXs-mOct4-T176A     |
| pDONR223-mOct4-T218A     | GATATGCAAATCGGAGGCCCTGGTGCAGGCC                 | GGCCTGCACCAGGGCCTCCGATTTGCATATC                | pMXs-mOct4-T218A     |
| pDONR223-mOct4-T228A     | CGGAAGAGAAAAGCGAGCTAGCATTGAGAACCGT<br>G         | CACGGTTCTCAATGCTAGCTCGCTTCTCTTCCG              | pMXs-mOct4-T228A     |
| pDONR223-mOct4-T240A     | GGTGGAGTCTGGAGGCCATGTTTCTGAAGTGCC               | GGCACTTCAGAAACATGGCCTCCAGACTCCACC              | pMXs-mOct4-T240A     |
| pDONR223-mOct4-T254A     | CCCTACAGCAGATCGCTCACATCGCCAATCAG                | CTGATTGGCGATGTGAGCGATCTGCTGTAGGG               | pMXS-mOct4-T254A     |
| pDONR223-mOct4-T294-296A | GAAGAGTATGAGGCTGCAGGGGCACCTTCCCA<br>GGGGGG      | CCCCCTGGGAAAGGTGCCCTGCAGCCTCATAC<br>TCTTC      | pMXS-mOct4-T294-296A |
| pDONR223-mOct4-T315A     | CCCCACTTTGGCGCCCCAGGCTATGGAAG                   | CTTCCATAGCCTGGGGCGCCAAAGTGGGG                  | pMXs-mOct4-T315A     |
| pDONR223-mOct4-T324-325A | GGAAGCCCCCACTTCGCCGCACTCTACTCAGTC<br>CCTTTTCC   | GGAAAAGGGACTGAGTAGAGTGCGGCGAAGTGG<br>GGGCTTCC  | pMXs-mOct4-T324-325A |
| pDONR223-mOct4-T343A     | CTCTGTTCCCGTCGCTGCTCTGGGCTCTC                   | GAGAGCCCAGAGCAGCGACGGGAACAGAG                  | pMXs-mOct4-T343A     |
| pDONR223-mOct4-Y62A      | CCATGTCCGCCCGCAGCCGAGTTCTGCGGAG                 | CTCCGCAGAACTCGGCTGCGGGCGGACATGG                | pMXs-mOct4-Y62A      |
| pDONR223-mOct4-Y70A      | GGAGGGATGGCAGCCTGTGGACCTCAGG                    | CCTGAGGTCCACAGGCTGCCATCCCTCC                   | pMXs-mOct4-Y70A      |
| pDONR223-mOct4-Y155A     | GGATCACCTTGGGGGCCACCCAGGCCGACGTG                | CACGTCCGGCCTGGGTGGCCCCCAAGGTGATCC              | pMXs-mOct4-Y155A     |
| pDONR223-mOct4-Y285A     | GCAAAAAGATCAAGTATTGAGGCTTCCCAACGAGA<br>AGAGTATG | CATACTTCTCGTTGGGAAGCCTCAATACTTGAT<br>CTTTTGC   | pMXs-mOct4-Y285A     |

|                      |                                        |                                       |                  |
|----------------------|----------------------------------------|---------------------------------------|------------------|
| pDONR223-mOct4-Y291A | CCCAACGAGAAGAGGCTGAGGCTACAGGGACAC      | GTGTCCTGTAGCCTCAGCCTCTTCTCGTTGGG      | pMXs-mOct4-Y291A |
| pDONR223-mOct4-Y318A | GGCACCCAGGCGCTGGAAGCCCCAC              | GTGGGGCTTCCAGCGCCTGGGGTGCC            | pMXs-mOct4-Y318A |
| pDONR223-mOct4-Y327A | CCACTTCACCACACTCGCCTCAGTCCCTTTCC       | GGAAAAGGGACTGAGGCGAGTGTGGTGAAGTGG     | pMXs-mOct4-Y327A |
| pDONR223-mOct4-K118A | CCCAATGCCGTGGCGTTGGAGAAGGTGGAACCAACTCC | GGAGTTGGTTCACCTTCTCCAACGCCACGGCATTGGG | pMXs-mOct4-K118A |
| pDONR223-mOct4-K121A | GCCGTGAAGTTGGAGGCGGTGGAACCAACTCCC      | GGGAGTTGGTTCACCGCCTCCAACTTCACGGC      | pMXs-mOct4-K121A |
| pDONR223-mOct4-K133A | GTCCCAGGACATGGCAGCCCTGCAGAAGGAG        | CTCCTTCTGCAGGGCTGCCATGTCTGGGAC        | pMXs-mOct4-K133A |
| pDONR223-mOct4-K137A | CATGAAAGCCCTGCAGGCGGAGCTAGAACAG        | CTGTTCTAGCTCCGCCTGCAGGGCTTTCATG       | pMXs-mOct4-K137A |
| pDONR223-mOct4-K144A | CTAGAACAGTTTCCGCGCTGCTGAAGCAGAAG       | CTTCTGCTTCCAGCAGCGCGCAAACCTGTTCTAG    | pMXs-mOct4-K144A |
| pDONR223-mOct4-K147A | GCCAAGCTGCTGGCGCAGAAGAGGATCACC         | GGTGATCCTCTTCTGCGCCAGCAGCTTGGC        | pMXs-mOct4-K147A |
| pDONR223-mOct4-K149A | GCTGCTGAAGCAGGCGAGGATCACCTTGGGG        | CCCCAAGGTGATCCTCGCCTGCTTCAGCAGC       | pMXs-mOct4-K149A |
| pDONR223-mOct4-K170A | GGCGTTCTCTTTGGAGCGGTGTTTCAGCCAG        | CTGGCTGAACACCGCTCCAAGAGAACGCC         | pMXs-mOct4-K170A |
| pDONR223-mOct4-K188A | GCAGCTCAGCCTTGCGAACATGTGTAAGCTGC       | GCAGCTTACACATGTTTCGAAGGCTGAGCTGC      | pMXs-mOct4-K188A |
| pDONR223-mOct4-K192A | CTTAAGAACATGTGTGCGCTGCGGCCCTG          | CAGGGGCCGCAGCGCACACATGTTCTTAAG        | pMXs-mOct4-K192A |
| pDONR223-mOct4-K199A | CCCCTGCTGGAGGCGTGGGTGGAGGAAG           | CTTCTCCACCCACGCCTCCAGCAGGGG           | pMXs-mOct4-K199A |
| pDONR223-mOct4-K215A | CAGGAGATATGCGCATCGGAGACCCTGGTG         | CACCAGGGTCTCCGATGCGCATATCTCCTG        | pMXs-mOct4-K215A |
| pDONR223-mOct4-K224A | GTGCAGGCCCGGGCGAGAAAGCGAACTAGC         | GCTAGTTCGCTTTCTCGCCCGGGCCTGCAC        | pMXs-mOct4-K224A |
| pDONR223-mOct4-K226A | GCCCGGAAGAGAGCGCAACTAGCATTGAG          | CTCAATGCTAGTTCGCGCTCTCTTCCGGGC        | pMXs-mOct4-K226A |
| pDONR223-mOct4-K244A | GAGACCATGTTTCTGGCGTGCCCGAAGCCCTCC      | GGAGGGCTTCGGGCACGCCAGAAACATGGTCTC     | pMXs-mOct4-K244A |
| pDONR223-mOct4-K247A | CTGAAGTGCCCGGCGCCCTCCCTACAG            | CTGTAGGGAGGGCGCCGGGCACTTCAG           | pMXs-mOct4-K247A |
| pDONR223-mOct4-K264A | CAGCTTGGGCTAGAGGCGGATGTGGTTCGAG        | CTCGAACACATCCGCCTTAGCCCAAGCTG         | pMXs-mOct4-K264A |
| pDONR223-mOct4-K277A | GTAACCGGCGCCAGGCGGGCAAAGATCAAG         | CTTGATCTTTTGCCCGCCTGGCGCCGGTTAC       | pMXs-mOct4-K277A |
| pDONR223-mOct4-K279A | CGCCAGAAGGGCGCAAGATCAAGTATTG           | CAATACTTGATCTTGCGCCCTTCTGGCG          | pMXs-mOct4-K279A |
| pDONR223-mOct4-R32A  | GGCTGGGTGGATTCTGCAACCTGGCTAAGC         | GCTTAGCCAGGTTGCAGAAATCCACCCAGCC       | pMXs-mOct4-R32A  |
| pDONR223-mOct4-R97A  | CAGGCAGGAGCAGCAGTGGAAAGCAACTCAG        | CTGAGTTGCTTCCACTGCTGCTCCTGCCTG        | pMXs-mOct4-R97A  |
| pDONR223-mOct4-R113A | CCCTGTGCCGACGCCCCCAATGCCGTG            | CACGGCATTGGGGGCGTCCGGCACAGGG          | pMXs-mOct4-R113A |
| pDONR223-mOct4-R150A | CTGCTGAAGCAGAAGGCGATCACCTTGGGG         | CCCCAAGGTGATCGCCTTCTGCTTCAGCAG        | pMXs-mOct4-R150A |
| pDONR223-mOct4-R179A | CAGACCACCATCTGTGCCTTCGAGGCCTTGCAG      | CTGCAAGGCCTCGAAGGCACAGATGGTGGTCTG     | pMXs-mOct4-R179A |
| pDONR223-mOct4-R194A | CATGTGTAAGCTGGCGCCCCTGCTGGAGAAG        | CTTCTCCAGCAGGGGCGCCAGCTTACACATG       | pMXs-mOct4-R194A |
| pDONR223-mOct4-R223A | CTGGTGCAGGCCGCGAAGAGAAAGCGAAC          | GTTTCGCTTCTCTTCGCGGCCTGCACCAG         | pMXs-mOct4-R223A |
| pDONR223-mOct4-R225A | CAGGCCCGGAAGGCAAAGCGAACTAGCATTGAG      | CTCAATGCTAGTTCGCTTTGCCTTCCGGGCCTG     | pMXs-mOct4-R225A |
| pDONR223-mOct4-R227A | GCCCGGAAGAGAAAGCGAACTAGCATTGAGAAC      | CGGTTCTCAATGCTAGTTGCCTTCTCTTCCGGGC    | pMXs-mOct4-R227A |

|                         |                                                         |                                                                                     |                  |
|-------------------------|---------------------------------------------------------|-------------------------------------------------------------------------------------|------------------|
|                         | CG                                                      |                                                                                     |                  |
| pDONR223-mOct4-R233A    | CTAGCATTGAGAACGCTGTGAGGTGGAGTCTG                        | CAGACTCCACCTCACAGCGTTCTCAATGCTAG                                                    | pMXs-mOct4-R233A |
| pDONR223-mOct4-R235A    | GAGAACCGTGTGGCGTGGAGTCTGGAG                             | CTCCAGACTCCACGCCACACGGTTCTC                                                         | pMXs-mOct4-R235A |
| pDONR223-mOct4-R268A    | GGGCTAGAGAAGGATGTGGTTGCAGTATGGTTC<br>TGTAAC             | GTTACAGAACCATACTGCAACCACATCCTTCTCTA<br>GCCC                                         | pMXs-mOct4-R268A |
| pDONR223-mOct4-R274A    | GTATGGTTCTGTAACGCGCGCCAGAAGGGC                          | GCCCTTCTGGCGCGCGTTACAGAACCATAC                                                      | pMXs-mOct4-R274A |
| pDONR223-mOct4-R275A    | GGTTCTGTAACCGGGCCAGAAGGGCAAAGAT<br>C                    | GATCTTTTGCCCTTCTGGGCCCGTTACAGAACC                                                   | pMXs-mOct4-R275A |
| pDONR223-mOct4-R280A    | CGCCAGAAGGGCAAAGCATCAAGTATTGAGTATT<br>CCC               | GGGAATACTCAATACTTGATGCTTTGCCCTTCTGG<br>CG                                           | pMXs-mOct4-R280A |
| pDONR223-mOct4-R288A    | CAAGTATTGAGTATTCCCAAGCAGAAGAGTATGA<br>GGCTACAGGG        | CCCTGTAGCCTCATACTCTTCTGCTTGGGAATACT<br>CAATACTTG                                    | pMXs-mOct4-R288A |
| pDONR223-mOct4-C272A    | GTTTCGAGTATGGTTCGCTAACCGGCGCCAG                         | CTGGCGCCGTTAGCGAACCATACTCGAAC                                                       | pMXs-mOct4-C272A |
| pDONR223-mOct4-D159A    | GGGTACACCCAGGCCCGCGTGGGGCTCACCCCT<br>G                  | CAGGGTGAGCCCCACGGCGGCCTGGGTGTACCC                                                   | pMXs-mOct4-D159A |
| pDONR223-mOct4-E181A    | CCATCTGTGCTTCGCGGCCTTGCAGCTCAGC                         | GCTGAGCTGCAAGGCCGCGAAGCGACAGATGG                                                    | pMXs-mOct4-E181A |
| pDONR223-mOct4-G165A    | GTGGGGCTCACCCCTGGCCGTTCTCTTTGAAAAG<br>G                 | CCTTTCAAAGAGAACGGCCAGGGTGAGCCCCAC                                                   | pMXs-mOct4-G165A |
| pDONR223-mOct4-N273A    | CGAGTATGGTTCTGTGCCCGGCGCCAGAAGG                         | CCTTCTGGCGCCGGGCACAGAACCATACTCG                                                     | pMXs-mOct4-N273A |
| pDONR223-mOct4-Q157A    | CCTTGGGGTACACCGCGGCCGACGTGGGGC                          | GCCCCACGTCGGCCGCGGTGTACCCCAAGG                                                      | pMXs-mOct4-Q157A |
| pDONR223-mOct4-Q174A    | GGAAAGGTGTTTCAGCGCGACCACCATCTGTGCG                      | GCGACAGATGGTGGTCGCGCTGAACACCTTTCC                                                   | pMXs-mOct4-Q174A |
| pDONR223-mOct4-V269A    | GGATGTGGTTCGAGCATGGTTCTGTAACCGG                         | CCGGTTACAGAACCATGCTCGAACCACATCC                                                     | pMXs-mOct4-V269A |
| pDONR223-mOct4-S186D    | GAGGCCTTGCAGCTCGACCTTAAGAACATGTG                        | CACATGTTCTTAAGGTCGAGCTGCAAGGCCTC                                                    | pMXs-mOct4-S186D |
| pDONR223-mOct4-S186E    | GAGGCCTTGCAGCTCGAACTTAAGAACATGTG                        | CACATGTTCTTAAGTTCGAGCTGCAAGGCCTC                                                    | pMXs-mOct4-S186E |
|                         |                                                         |                                                                                     |                  |
|                         |                                                         |                                                                                     |                  |
| <b>Other constructs</b> | <b>Primer pairs</b>                                     |                                                                                     | <b>Source</b>    |
|                         | <b>Sense primer</b>                                     | <b>Antisense primer</b>                                                             |                  |
| pDONR223-mOct4          | CGGTGTACAAAAAGCAGGCTGGATGGCTGGAC<br>ACCTGGCTTCAGACTTCCG | CGGTGTACAAAAGCTGGGTTTCACTTGTTCATCG<br>TCGTCTTTGTAGTCGTTTGAATGCATGGGAGAGCC<br>CAGAGC |                  |
| pMXs-CHR-ccdB           | CGGTAAATTA<br>ATAAGCAGAGCTCTCTGGCTAACTG                 | CGGCTCGAGCATTACTACGTAGAATCGAGACCGA                                                  |                  |

|                                                       |                                                        |                                                         |                                 |
|-------------------------------------------------------|--------------------------------------------------------|---------------------------------------------------------|---------------------------------|
| pUAST-SapI-1xCR4                                      | CGGGGTACC<br>GCTCTTCGAACTGGGTGTGGGGAGGTTGTAGC          | CGGTCTAGA<br>GCTCTTCGGTTTACGAGATTAAGGAAGGGC             |                                 |
| pUAST-NheI-1xCR4                                      | CGGGGTACC<br>GCTCTTCGAACTGGGTGTGGGGAGGTTGTAGC          | CGGTCTAGAGCTAGCGGTTTACGAGATTAAGGAA<br>GGGC              |                                 |
| pUAST-6xCR4                                           |                                                        |                                                         | subcloned from pUAST-SapI-6XCR4 |
| pGL4.2-6xCR4                                          |                                                        |                                                         | subcloned from pUAST-6XCR4      |
| pGL4.2-5xW                                            | CCCCTGAGCAAAACACCACCTGGGTAATTTGCAT<br>TTCTAAAATAAGTCGA | GGGTCGACTTATTTTAGAAATGCAAATTACCCAGG<br>TGGTGTGTTGCTCAG  |                                 |
| pGL4.2-5xW-37TK                                       | CGGCTCGAGGGTCCACTTCGCATATTAAGGTGA<br>CG                | CGGAGATCTCGGCACGCTGTTGACGCTGTTAAGC<br>GGGTCGCTGC        |                                 |
| pMXs-mOct4- $\Delta$ NTD-Flag                         | CGGGGATCCATGGACATGAAAGCCCTGCAGAAG<br>G                 | CGGGCGCCGCTCACTTGTGTCATCGTCTTTGT<br>AGTCGTTTGAATGCATGGG |                                 |
| pMXs-mOct4- $\Delta$ CTD-Flag                         | CGGGGATCCATGGCTGGACACCTGGCTTCAGAC                      | CGGGCGCCGCTCACTTGTGTCATCGTCTTTGT<br>AGTCACTTGATCTTTTGCC |                                 |
| pMXs-mOct4- $\Delta$<br>POU(NTD+CTD)-Flag             |                                                        |                                                         |                                 |
| pMXs-mOct4-NTD                                        | CGGGGATCCATGGCTGGACACCTGGCTTCAGAC                      | CGGGAATTCCTGGGACTCCTCGGGAGTTGGTTCC                      |                                 |
| pMXs-mOct4-CTD-Flag                                   | CGGGAATTCATTGAGTATTCCAACGAGAAGAG                       | CGGGCGCCGCTCACTTGTGTCATCGTCTTTGT<br>AGTCGTTTGAATGCATGGG |                                 |
| pMXs-mOct4-POU-Flag                                   | CGGGGATCCATGGACATGAAAGCCCTGCAGAAG<br>G                 | CGGGCGCCGCTCACTTGTGTCATCGTCTTTGT<br>AGTCACTTGATCTTTTGCC |                                 |
| pMXs-mOct4- $\Delta$ NTD-<br>YAP <sup>TAD</sup> -Flag | CGGGGATCCATGGACATGAAAGCCCTGCAGAAG<br>G                 | CGGGCGCCGCGTTTTGAATGCATGGGAGAGCCC<br>AGAG               |                                 |
| pMXs-mOct4- $\Delta$ CTD-<br>YAP <sup>TAD</sup> -Flag | CGGGGATCCATGGCTGGACACCTGGCTTCAGAC                      | CGGGCGCCGCACTTGATCTTTTGCCCTTCTGGC<br>GC                 |                                 |
| pMXs-mOct4- $\Delta$ POU-<br>YAP <sup>TAD</sup> -Flag | CGGGGATCCATGGCTGGACACCTGGCTTCAGAC                      | CGGGCGCCGCGTTTTGAATGCATGGGAGAGCCC<br>AGAG               |                                 |
| pMXs-mOct4-POU-YAP <sup>TAD</sup> -<br>Flag           | CGGGGATCCATGGACATGAAAGCCCTGCAGAAG<br>G                 | CGGGCGCCGCACTTGATCTTTTGCCCTTCTGGC<br>GC                 |                                 |
| pMXs-YAP <sup>TAD</sup> -Flag                         | CGGTTAATTAATGCAGGGAGGCGTCCTGGGTG<br>GAG                | CGGGGATCCCTACTTGTCATCGTCATCCTTGTAAT<br>CTAACC           |                                 |

|                                            |                                              |                                                                       |                                 |
|--------------------------------------------|----------------------------------------------|-----------------------------------------------------------------------|---------------------------------|
| pMXs-EGFP-FLAG                             | CGGTTAATTAATGGTGAGCAAGGGCGAGGAGC<br>TGTTTC   | CGGCTCGAGTCACTTGTGCATCGTCGTCTTTGTAGT<br>CCTTGTACAGCTCGTCCATGCCGAGAGTG |                                 |
| pMXs-mSox2-Myc                             | CGGGAATTCATGTATAACATGATGGAGACGGAG<br>CTGAAGC | CGGGCGGCCGCTCACAGATCCTCTTCTGAGATGA<br>GTTTTTGTTCATGTGCGACAGGGG        |                                 |
| pMXs-mOct4-WT-YAP <sup>TAD</sup> -<br>Flag |                                              |                                                                       | <i>Stem Cell Reports 2:1-9.</i> |
| pMXS-mKlf4                                 |                                              |                                                                       | purchased from<br>addgene       |
| pMXs-mNanog                                |                                              |                                                                       | purchased from<br>addgene       |
| pMXs-m-cMyc                                |                                              |                                                                       | purchased from<br>addgene       |
| pMXs-hOct4-WT-Flag                         | CGGGGATCCATGGCGGGACACCTGGCTTCGGAT<br>TTCG    | CGGGCGGCCGCTCACTTGTGCATCGTCCTTTGT<br>AGTCGTTTGAATGCATGGGAGAG          |                                 |
| pMXs-hOct4-K177A-Flag                      | GGTTCTATTTGGGGCGGTATTCAGCCAAAC               | GTTTGGCTGAATACCGCCCCAAATAGAACC                                        |                                 |
| pMXs-hOct4-K222A-Flag                      | CAGGAGATATGCGCAGCAGAAACCCTC                  | GAGGGTTTCTGCTGCGCATATCTCCTG                                           |                                 |
